# Supplementary material for: Tracking human skill learning with a hierarchical Bayesian sequence model
Source: PubMed Central journal article supplement (PMC9744313; doi:10.1371/journal.pcbi.1009866), 2022-11-30
Supplement: pcbi.1009866.s001.pdf [file pcbi.1009866.s001.pdf]

## S1 Appendix

---

**S1.A Algorithm. Parsing the sequence with the ddHCRP as both a generative and recognition model.** We use the ddHCRP back-off procedure to obtain the probability of a customer corresponding to the key press, and to update the ddHCRP seating arrangements probabilistically with a new customer corresponding to the actual event (i.e. the instruction that differs from the key press in the case of errors).

---

**e**: vector of all events  
**k**: vector of all key presses  
**c**: vector of customer seating arrangement  
 **$\alpha$** : vector of HCRP strength values  
 **$\lambda$** : vector of HCRP decay rate values  
**N**: maximum context depth

**procedure** PARSE(**e, k, c,  $\alpha$ ,  $\lambda$** )

**P**  $\leftarrow$   $\langle \rangle$

**t**  $\leftarrow$  0

**while** **t** < |**e**| **do**

**if** **t=0** **then**

**u**  $\leftarrow$   $\langle \rangle$

**else**

**left**  $\leftarrow$   $\max(0, t - N)$

**right**  $\leftarrow$  **t** - 1

**u**  $\leftarrow$  **e**<sub>left:right</sub>

**end if**

**P**  $\leftarrow$   $\langle$  CUSTOMERPROB(**u, k<sub>t</sub>, t, c,  $\alpha$ ,  $\lambda$** )  $\rangle$   $\triangleright$  append key press prob. computed by S1.B Algorithm.

**c**  $\leftarrow$  ADDCUSTOMER(**u, e<sub>t</sub>, t, c,  $\alpha$ ,  $\lambda$** )  $\triangleright$  update seating arrangement by S1.C Algorithm.

**t**  $\leftarrow$  **t** + 1

**end while**

**return P**

**end procedure**

---

---

**S1.B Algorithm. Generative process of the ddHCRP: computing the probability of an observation via the back-off procedure.**

---

**u**: vector of previous events (context)  
**l**: label of the observation  
**L**: number of all labels  
**t**: trial  
**c**: vector of customer seating arrangement  
 **$\alpha$** : vector of HCRP strength values  
 **$\lambda$** : vector of HCRP decay rate values  
**n**: HCRP level

```
function CUSTOMERPROB(u, l, t, c,  $\alpha$ ,  $\lambda$ , n=None)
  if n=None then
     $n \leftarrow |\mathbf{u}| + 1$                                 ▷ start back-off procedure from level n
  end if
  if n=0 then
    return 1/L                                       ▷ uninformed base distribution
  else
     $C_{\mathbf{u}l} \leftarrow |\mathbf{c}_{\mathbf{u}l}|$                        ▷ number of customers with dish l in restaurant u
     $old \leftarrow \sum_{i=0}^{C_{\mathbf{u}l}} e^{\frac{-\delta_{\mathbf{c}_{\mathbf{u}l}i}}{\lambda_{|\mathbf{u}|}}}$     ▷ weighted sum of recency of customers with dish l in restaurant u
     $new \leftarrow \alpha_{|\mathbf{u}|}$                              ▷ prior strength of level
     $norm \leftarrow \alpha_{|\mathbf{u}|} + \sum_{i=0}^{C_{\mathbf{u}l}} e^{\frac{-\delta_{\mathbf{c}_{\mathbf{u}l}i}}{\lambda_{|\mathbf{u}|}}}$ 
    return  $\frac{old}{norm} + \frac{new}{norm} \times \text{CUSTOMERPROB}(\pi(\mathbf{u}), l, t, \mathbf{c}, \mathbf{\alpha}, \mathbf{\lambda}, n - 1)$   ▷ back off to level below
  end if
end function
```

---

---

**S1.C Algorithm. Recognition process of the ddHCRP: update the HCRP seating arrangements with new observation.**

---

**u**: vector of previous events (context)  
**l**: label of the observation  
**t**: trial  
**c**: vector of customer seating arrangement  
 **$\alpha$** : vector of HCRP strength values  
 **$\lambda$** : vector of HCRP decay rate values  
**n**: HCRP level

**procedure** ADDCUSTOMER(**u**, **l**, **t**, **c**,  **$\alpha$** ,  **$\lambda$** , n=None)

**if** n=None **then**

$n \leftarrow |\mathbf{u}| + 1$

    ▷ start back-off procedure from level *n*

**end if**

**if** n=0 **then**

**return** **c**

    ▷ backed off to level 0

**else**

$C_{ul} \leftarrow |c_{ul}|$

    ▷ number of previous customers with dish *l* in restaurant **u**

$c_{ul} \leftarrow \langle t \rangle$

    ▷ append customer timestamp to vector of customers with dish *l* in restaurant **u**

    With probabilities proportional to:

$\sum_{i=0}^{C_{ul}} e^{-\frac{\delta c_{ul} i}{\lambda_{|u|}}}$

    ▷ weighted sum of recency of *previous* customers with dish *l* in restaurant **u**

**return** **c**

    ▷ terminate back-off

$\alpha_{|u|} \times \text{CUSTOMERPROB}(\pi(\mathbf{u}), l, t, \mathbf{c}, \boldsymbol{\alpha}, \boldsymbol{\lambda}, n - 1)$

    ▷ weighted label probability on level below

**return** ADDCUSTOMER( $\pi(\mathbf{u}), l, t, \mathbf{c}, \boldsymbol{\alpha}, \boldsymbol{\lambda}, n - 1$ )

    ▷ back off to level below

**end if**

**end procedure**

---
