# Supplementary material for: Tracking human skill learning with a hierarchical Bayesian sequence model
Source: PubMed Central journal article supplement (PMC9744313; doi:10.1371/journal.pcbi.1009866), 2022-11-30
Supplement: pcbi.1009866.s007.pdf [file pcbi.1009866.s007.pdf]

Table S1: **Hyperparameter prior sets for fitting the response times of all responses (Sections 3.2-3.6) and errors only (Section 3.7).** In session 1, the prior was uninformed. In all subsequent sessions, the prior was a truncated Gaussian  $\mathcal{N}'$  with the mean of MAP value in the previous session, a fixed variance, and the same interval that the uninformed distributions have in session 1. For most of our results, the first, wider of  $\lambda$  prior was used to allow for extreme forgetfulness or unforgetfulness. For the prediction of response times of errors, we restricted our model to a more forgetful regime by narrowing the  $\lambda$  prior.

|          | Session 1                    |                                  | Sessions 2-10                             |                                                     |
|----------|------------------------------|----------------------------------|-------------------------------------------|-----------------------------------------------------|
|          | $\alpha$                     | $\lambda$                        | $\alpha$                                  | $\lambda$                                           |
| all RT   | $\mathcal{U}(10^{-4}, 10^2)$ | $\mathcal{U}(5 * 10^{-4}, 1)$    | $\mathcal{N}'(\alpha_{MAP_{prev}}, 10^2)$ | $\mathcal{N}'(\lambda_{MAP_{prev}}, 2.5 * 10^{-3})$ |
| error RT | $\mathcal{U}(10^{-4}, 10^2)$ | $\mathcal{U}(1.25 * 10^{-2}, 1)$ | $\mathcal{N}'(\alpha_{MAP_{prev}}, 10^2)$ | $\mathcal{N}'(\lambda_{MAP_{prev}}, 2.5 * 10^{-3})$ |
