# Supplementary material for: Tracking human skill learning with a hierarchical Bayesian sequence model
Source: PubMed Central journal article supplement (PMC9744313; doi:10.1371/journal.pcbi.1009866), 2022-11-30
Supplement: pcbi.1009866.s008.pdf [file pcbi.1009866.s008.pdf]

Table S2: **Mixed effects model with random intercepts for participants and several low-level predictors, sorted by their absolute fitted slope B (in ms).** Due to the large data set, all factors are significant. However, we made an arbitrary cut-off at the horizontal line for the low-level effects included in the response model because of the small effect sizes.

|                        | B       | $\beta$ | p     |
|------------------------|---------|---------|-------|
| intercept              | 301.192 | 3.864   | <.001 |
| repetition             | -36.858 | 0.306   | <.001 |
| error                  | -21.072 | 0.296   | <.001 |
| post-error             | 4.566   | 0.285   | <.001 |
| spatial distance       | 2.107   | 0.140   | <.001 |
| left hand              | 0.893   | 0.174   | <.001 |
| pre-error trial index  | -0.705  | 0.006   | <.001 |
| post-error trial index | 0.440   | 0.006   | <.001 |
